# Supplementary material
Source: PubMed Central journal article supplement (PMC2906306)

## Supplementary material

**Table S1) Bacterial mutants of *Pseudomonas putida* KT2440 used for chemotaxis assays.** Shown are the coordinates of the insertion of the mini-Tn5 cassette into the genome as determined by sequencing as well as an analysis of the gene products of the ORFs mutated in the 12 mutants. Given is their size, the domains predicted by SMART (<http://smart.embl-heidelberg.de/>), the number of transmembrane regions as determined by DAS (<http://www.sbc.su.se/~miklos/DAS/>).

Mutants were obtained from the *Pseudomonas* Reference Culture Collection. They were generated by mini-Tn5 mutagenesis, as described before using pUT-Km as source for the mini-Tn5 transposon (Duque *et al.*, 2007). The collection consists of more than 3000 independent mutants.

Duque E, Molina-Henares AJ, de la Torre J, Molina-Henares MA, del Castillo T et al (2007) Towards a genome-wide mutant library of *Pseudomonas putida* strains KT2440. In *Pseudomonas, volume V*, Ramos JL, Filloux A (eds) pp 227-251. Springer, Dordrecht, The Netherlands

| ORF<br>MCP | Coordinates for<br>Mini-Tn5 insertion | Size<br>(amino<br>acids) | domains predicted<br>in SMART | No. of<br>TM <sup>1</sup> |
|------------|---------------------------------------|--------------------------|-------------------------------|---------------------------|
| pp0562     | 653530                                | 653                      | HAMP, MA                      | 2                         |
| pp1228     | 1403877                               | 688                      | HAMP, MA                      | 2                         |
| pp1371     | 1561561                               | 624                      | HAMP, MA                      | 2                         |
| pp1819     | 2045068                               | 646                      | HAMP, MA                      | 2                         |
| pp1940     | 2193684                               | 716                      | HAMP, MA                      | 2                         |
| pp2120     | 2419352                               | 555                      | HAMP, MA                      | 2                         |
| pp2249     | 2566591                               | 643                      | HAMP, MA                      | 2                         |
| pp2310     | 2639862                               | 492                      | HAMP, MA                      | 2                         |
| pp2643     | 3029741                               | 550                      | HAMP, MA                      | 2                         |
| pp3950     | 4456080                               | 725                      | HAMP, MA                      | 1                         |
| pp4658     | 5284039                               | 639                      | HAMP, MA                      | 2                         |
| pp4989     | 5687728                               | 686                      | HAMP, MA                      | 2                         |

<sup>1</sup> Prediction of transmembrane helices according to the DAS programme (Cserzo et al. (1997) Prot. Eng. 10, 673.

## Figure legends for supplementary figures

**Fig. S1: Genomic environment of the *mcpS* gene.** Gene annotation according to the *Pseudomonas* genome database (<http://www.pseudomonas.com/>).

**Fig. S2: Compounds used for ITC experiments with McpS-LBD.** Compounds which bind are highlighted in blue and the corresponding thermodynamic parameters are given in Fig. 3 of the article.

**Fig. S3) Agarose plug assays of *P. putida* KT2440 and its *mcpS* deficient mutant towards succinate, fumarate, malate and oxaloacetate.** Compounds were present at a concentration of 5 mM. The wild-type strain showed a strong chemotactic response towards succinate, malate and fumarate. This phenotype was characterised by the formation of well-defined rings, which started to appear after 4 min. A chemotactic response to oxaloacetate was also observed, but the intensity of ring formation was weaker and delayed in time. Using this assay no chemotaxis towards butyrate, citrate and isocitrate was detected. The more sensitive capillary assays, however, revealed a weak response towards these latter 3 compounds.

**Fig. S4) Agarose plug assays of *P. putida* KT2440 towards mixtures of toluene with butyrate and isocitrate.** No chemotaxis is observed towards butyrate and isocitrate using this technique (a weak response is only seen using the capillary method which has a higher sensitivity) but a significant response is seen towards toluene. Chemotaxis towards toluene is mediated by a different MCP. However, the presence of 5 mM butyrate or isocitrate did not alter chemotaxis towards toluene. This is consistent with the notion that isocitrate and butyrate have no nonspecific effect on the chemotactic apparatus which would result in cell paralysis.

Fig S1

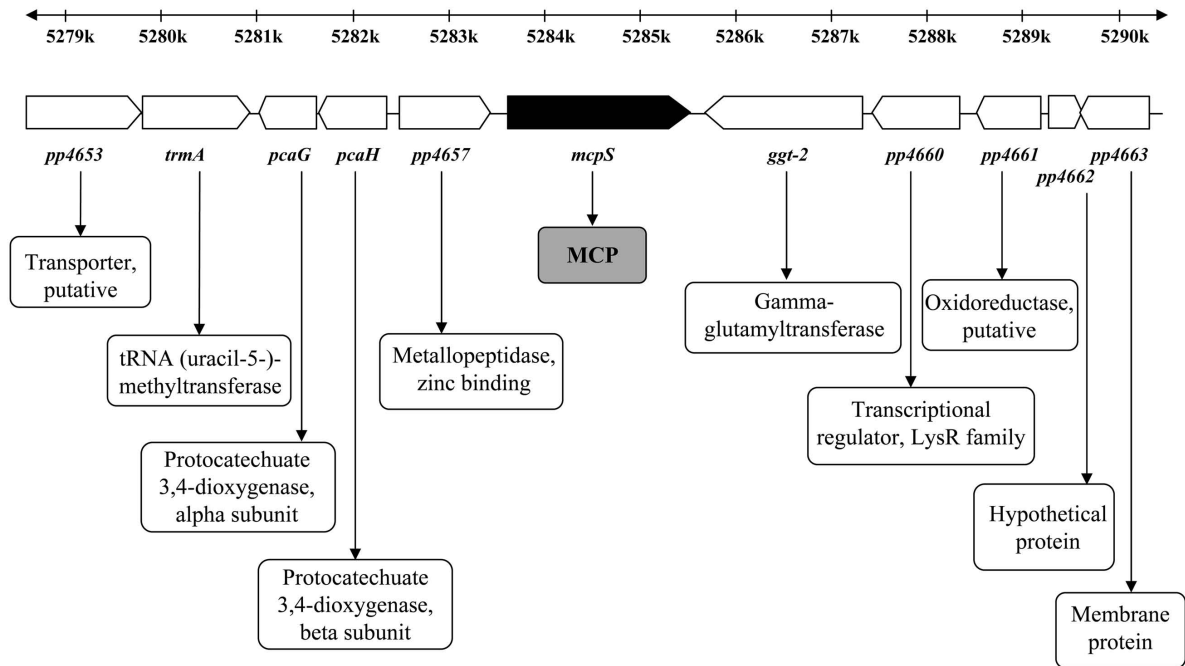

## Monocarboxylic acids

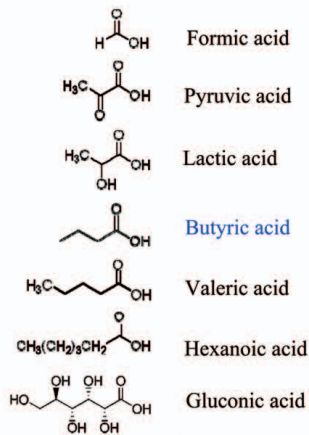

## Dicarboxylic acids

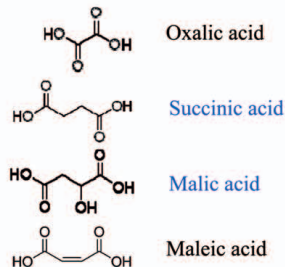

## Tricarboxylic acids

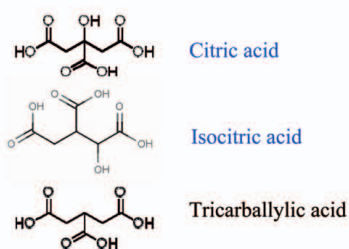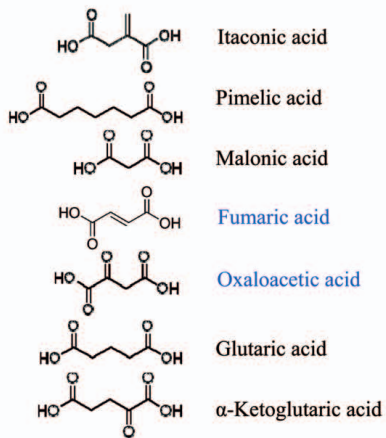

Fig S2

## Carbohydrates

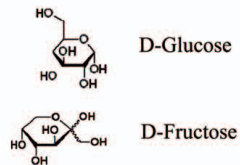

## Aminoacids

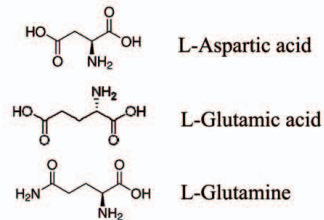

**Fig S3**

Succinate

Fumarate

Malate

Oxaloacetate

*P. putida* KT2440

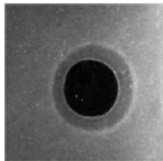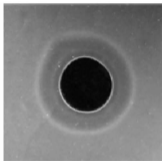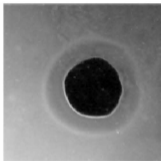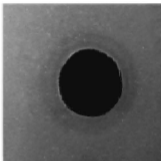

*P. putida* KT2440  
*mcpS::Tn5*

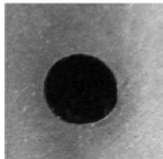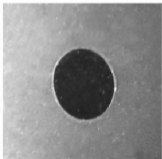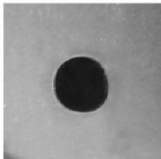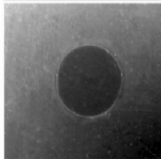

**Fig S4**

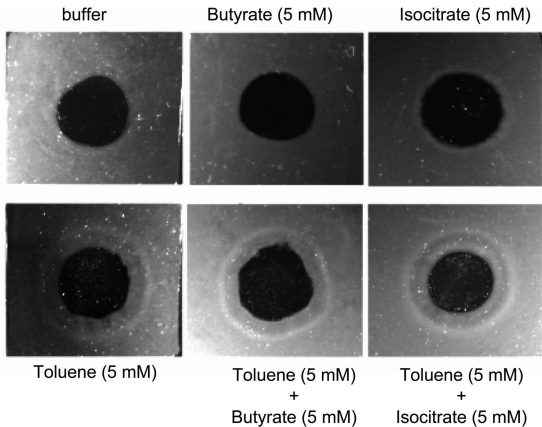

Supplement: supp_M110.110403_jbc.M110.110403-1.pdf [file supp_M110.110403_jbc.M110.110403-1.pdf]
